# Supplementary material for: Clinicopathologic and genetic analysis of invasive breast carcinomas in women with germline CHEK2 variants
Source: Breast Cancer Res Treat. 2023 Dec 13;204(1):171–9. doi: 10.1007/s10549-023-07176-8 (PMC10806021; doi:10.1007/s10549-023-07176-8)
Supplement: Supplementary file 1 — Supplementary file1 (XLSX 41 KB) [file 10549_2023_7176_MOESM1_ESM.xlsx]

## Sheet: Table S1
Supplementary Table S1: Clinicopathologic characteristics of study cohort
Patient	Age	CHEK2 pathogenic/likely pathogenic varianta	Alteration type	Other pathogenic/likely pathogenic variantsa	Clinical presentation	Indication for genetic testing	Family cancer history	1st degree relative with breast ca	Personal ca history (age)
1	45	c.1100delC (p.Thr367fs)	Truncating	None	Palpable mass	After initial cancer diagnosis	breast (M,76)	Yes	None
2	45	c.1100delC, homozygous	Truncating	None	Calcifications (screen detected)	After initial cancer diagnosis	breast (M, N/a); prostate (GF, 50)	Yes	None
3	38	c.1100delC (p.Thr367fs)	Truncating	None	Calcifications (screen detected)	After initial cancer diagnosis	uterine (S, 42)	No	None
4	34	c.433delC (p.Arg145Glyfs*16)	Truncating	MUTYH c.536A>G (p.Tyr179Cys)	Palpable mass	After initial cancer diagnosis	breast (M, N/a)	Yes	None
5	67	c.1263delT (p.Ser422Valfs*15)	Truncating	None	Calcifications (screen detected)	Family member with CHEK2	breast (C, 71)	No	breast (49)
6	65	c.683+2T>C	Splicing	None	Calcifications (screen detected)	After initial cancer diagnosis	breast (S, N/a)	Yes	uterine (62)
7	75	c.1283C>T (p.S428F)	Missense	ATM c.1027_1030del (p.Glu343Ilefs*2)	Palpable mass	After initial cancer diagnosis	breast (C, 60s)	No	None
8	42	c.470T>C (p.Ile157Thr)	Missense	None	Calcifications (screen detected)	After initial cancer diagnosis	breast (GM, 65)	No	None
9	43	c.1100delC (p.Thr367fs)	Truncating	None	Mass (screen detected)	After initial cancer diagnosis	breast (M, 73, A, 50); colon (GM, 49)	Yes	None
10	58	c.349A>G (p.Arg117Gly)	Missense	None	Mass (screen detected)	Family member with CHEK2	breast (M, 60; S, 56; A, 80; GM, N/a)	Yes	uterine (58)
11	59	c.444+1G>A	Splicing	None	Palpable mass	After initial cancer diagnosis	breast (N, 28)	No	plasma cell neoplasm (50)
12	44	Exon 1/5'UTR del	Deletion	None	Palpable mass	After initial cancer diagnosis	breast (M, 55, GM, 48)	Yes	None
13	25	c.1100delC (p.Thr367fs)	Truncating	PALB2 c.2827_2830del (p.Glu943Serfs*18)	Mass (screen detected)	Family member with CHEK2	breast (M, 23, GM, N/a, A, N/a); thyroid (A, N/a)	Yes	None
14	38	c.1100delC (p.Thr367fs)	Truncating	None	Palpable mass	After initial cancer diagnosis	N/a (adopted)	N/a	None
15	71	c.1283C>T (p.S428F)	Missense	None	Mass (screen detected)	Family member with CHEK2	breast (M, 73, S, 66)	Yes	None
16	55	c.1100delC (p.Thr367fs)	Truncating	None	Palpable mass	After initial cancer diagnosis	breast (M, 72, S, 32, S, 48)	Yes	breast (34)
17	31	Exon 9-10 del	Deletion	None	Palpable mass	After initial cancer diagnosis	None	No	None
18	47	c.1283C>T (p.S428F)	Missense	None	Mass (screen detected)	Wisdom study	breast (GM, 55, U, 70s)	No	None
19	44	c.1100delC (p.Thr367fs)	Truncating	None	Palpable mass (bilateral)	After initial cancer diagnosis	breast (A, N/a, C, N/a); prostate (F, N/a)	No	None
20	46	c.1263delT (p.Ser422Valfs*15)	Truncating	None	Palpable mass	After initial cancer diagnosis	breast (GM, 91); uterine (M, 55)	No	None
21	31	Exon 8 del	Deletion	None	Palpable mass	After initial cancer diagnosis	breast (A, N/a); melanoma (M, N/a)	No	None
22	29	c.1100delC (p.Thr367fs)	Truncating	ATM c.237del (p.Lys79fs)	Palpable mass	After initial cancer diagnosis	breast (A, 50); prostate (GF, 72)	No	None
23	45	c.349A>G (p.Arg117Gly)	Missense	None	Palpable mass	After initial cancer diagnosis	leukemia (U, 67)	No	None
24	36	c.1100delC (p.Thr367fs)	Truncating	None	Calcifications (screen detected)	After initial cancer diagnosis	breast (PA, 49, MGM, 40); prostate (F, 61)	No	None
25	35	Exon 8-9 del	Deletion	None	Palpable mass	After initial cancer diagnosis	None	No	None
26	70	Exon 9-10 del	Deletion	None	Mass (screen detected)	After initial cancer diagnosis	breast (A1, 70; A2, 70s)	No	None
27	30	c.444+1G>A	Splicing	None	Palpable mass	Strong family history	breast (A, 40s, GM, 40s)	Yes	None
28	61	c.1100delC (p.Thr367fs)	Truncating	None	Palpable mass	After initial cancer diagnosis	breast (M, 40, GM, 40s)	Yes	None
29	49	c.1100delC (p.Thr367fs)	Truncating	None	Palpable mass	After initial cancer diagnosis	prostate (F, 75)	No	None
30	43	c.1100delC (p.Thr367fs)	Truncating	None	Mass (screen detected)	After initial cancer diagnosis	breast (MA, 72)	No	breast (39)
31	45	c.707T>C (p.Leu236Pro)	Missense	RAD50 c.2517dupA (p.D480fs)	Mass (screen detected)	After initial cancer diagnosis	breast (S, 44); brain (S, 48)	Yes	None
32	39	c.499G>A (p.Gly167Arg), homozygous	Missense	None	Palpable mass	After initial cancer diagnosis	breast (F, 64)	Yes	None
33	57	c.1100delC (p.Thr367fs)	Truncating	None	Mass (screen detected)	After initial cancer diagnosis	breast (A, 40s)	No	None
34	39	c.470T>C (p.Ile157Thr)	Missense	None	Palpable Mass	After initial cancer diagnosis	None	No	None
35	47	c.846+4_846+7del	Splicing	None	Mass (screen detected)	After initial cancer diagnosis	None	No	thyroid (46)
aAll heterozygous unless otherwise noted
Abbreviations: A, aunt; C, cousin; Ca, cancer; F, father; GF, grandfather; GM, grandmother; M, mother; N, niece; N/a, not available; S, sister; U, uncle.

## Sheet: Table S2
Supplementary Table S2: Clincopathologic characteristics of CHEK2 breast cancers
Tumor	Age	Intraductal neoplasia	Histologic type	Bilateral	Multifocal	Surgery	Nottingham grade(s)	Size (cm)a	NAT	T stage	Lymph nodes	N Stage	ER	PR	HER2	Ki67 (non-treated)	Surrogate molecular subtype 14d	Surrogate molecular subtype 20e	LVI	TILs (%)	Oncotype	Mammaprint	Adjuvant HT	Adjuvant CT	Adjuvant RT	Distant Metastasis	Follow Up (Months)	Disease Status
1	45	X	Invasive ductal carcinoma	No	No	Partial mastectomy*	2	1.4	No	T1c	(7/18)	N2a	+	+	-f	0.1	Luminal A	Luminal A	Yes	< 10	X	X	Yes	Yes	No	No	90	NED
2	45	DCIS, FEA	Invasive ductal carcinoma	No	No	Total mastectomy	2	0.5	No	T1a	(0/4)	N0	+	+	+	0.15	Luminal B HER2+	Luminal B HER2+	No	< 10	X	X	Yes	No	No	No	54	NED
3	38	DCIS, ALH	Invasive ductal carcinoma	No	No	Total mastectomy	3	0	Yes	yT0	0/4	N0	-	-	+	X	HER2 enriched	HER2 enriched	Yes	N/a	X	X	No	Yes	No	Yes (bone)	67	AWD
4	34	DCIS	Invasive ductal carcinoma with minor apocrine	No	No	Total mastectomy	1	0.8	No	T1b	0/2	N0	+	-	-	0.1	Luminal B HER2-	Luminal B HER2-	No	N/a	X	Low risk	No	No	No	Yes (bone)	74	AWD
5	67	DCIS	Invasive ductal carcinoma	No	No	Total mastectomy	2	< 0.1	No	T1mi	(0/1)	N0	+	+	-	X	Luminal B HER2-	Luminal B HER2-	No	< 10	X	X	No	No	No	No	58	NED
6	65	F-LCIS	Invasive lobular carcinoma, alveolar pattern	No	No	Total mastectomy	1	0.25	No	T1a	(0/6)	N0	+	+	-	X	ND	ND	No	< 10	X	X	Yes	No	No	No	56	NED
7	75	ADH	Invasive ductal carcinoma	No	No	Partial mastectomy	1	0.6	Yes	yT1b	X	Nx	+	+	-	0.1	Luminal A	Luminal A	No	N/a	X	Low risk	Yes	No	No	No	58	NED
8	42	DCIS	Invasive ductal carcinoma	No	No	Partial mastectomy	2	1.1	Yes	yT1c	(1mi/3)	N1mi	+	+	-	0.6	Luminal B HER2-	Luminal B HER2-	Yes	< 10	X	X	Yes	Yes	Yes	Yes (liver, brain)	117	DOD
9	43	DCIS, FEA, ALH	Invasive ductal carcinoma	No	No	Total mastectomy	1	1.4	No	T1c	(2mi/3)	N1mi	+	+	-	0.2	Luminal B HER2-	Luminal B HER2-	No	< 10	21	Low risk	Yes	No	No	No	23	NED
10	58	ADH, FEA	Invasive ductal carcinoma	No	No	Partial mastectomy	2	1.1	No	T1c	(0/3)	N0	+	+	-	0.05	Luminal A	Luminal A	No	< 10	X	X	Yes	No	Yes	No	33	NED
11	59	DCIS	Invasive papillary carcinoma	No	No	Total mastectomy	2	5.4	No	T3	(0/1)	N0	+	-	-	0.25	Luminal B HER2-	Luminal B HER2-	No	< 10	31	X	Yes	Yes	No	Yes (lung)	54	AWD
12	44	DCIS	Invasive ductal carcinoma	No	No	Total mastectomy	2	1.1	No	T1c	(1i+/5)	N0(i+)	+	-	-	0.1	Luminal B HER2-	Luminal B HER2-	No	< 10	25	High risk	Yes	Yes	No	No	36	NED
13	25	DCIS	Invasive ductal carcinoma	No	No	Total mastectomy	3	2	No	T1c	(0/8)	N0	+	+	-	0.2	Luminal B HER2-	Luminal B HER2-	No	< 10	21	X	No	Yes	No	No	30	NED
14	38	DCIS, ADH, FEA	Invasive ductal carcinoma	No	No	Total mastectomy	3	1	Yes	yT1b	(2i+/7)	N0(i+)	+	+	+	0.3	Luminal B HER2+	Luminal B HER2+	No	N/a	X	X	Yes	No	No	No	39	NED
15	71	DCIS, ADH	Invasive ductal carcinoma	No	No	Partial mastectomy	2	0.5	No	T1a	(0/1)	N0	+	+	-	0.1	Luminal A	Luminal A	No	< 10	23	X	Yes	No	Yes	No	33	NED
16Ab	55	DCIS	Invasive ductal carcinoma	No	Yes	Total mastectomy	2	2.1	Yes	yT2	(0/2)	N0	+	-	-	X	Luminal B HER2-	Luminal B HER2-	No	< 10	X	X	Yes	No	Yes	No	29	NED
16Bb	N/a	N/a	Invasive carcinoma with ductal/lobular features	No	Yes	N/a	1	2.1	No	N/a	N/a	N/a	+	+	-	X	ND	ND	No	< 10	X	X	X	X	X	X	X	X
16Cb	N/a	N/a	Invasive ductal carcinoma	No	Yes	N/a	1	0.5	No	N/a	N/a	N/a	X	X	X	X	ND	ND	No	< 10	X	X	X	X	X	X	X	X
17	31	DCIS	Invasive ductal carcinoma	No	No	Total mastectomy	3	0.3	Yes	yT1a	(0/3)	N0	+	+	+	0.6	Luminal B HER2+	Luminal B HER2+	No	< 10	X	X	Yes	Yes	No	No	35	NED
18	47	DCIS, ALH	Invasive ductal carcinoma	No	No	Total mastectomy	2	1.2	Yes	yT1c	(0/3)	N0	+	+	-	0.2	Luminal B HER2-	Luminal B HER2-	No	< 10	X	Low risk	Yes	No	Yes	No	40	NED
19Ac	44	DCIS, LCIS, ADH	Invasive ductal carcinoma	Yes	Yes	Total mastectomy	2	1.5	Yes	yT1c	(0/2)	N0	+	+	-	0.2	Luminal B HER2-	Luminal B HER2-	No	< 10	13	X	Yes	Yes	No	No	41	NED
19Bc	X	DCIS, LCIS	Invasive ductal carcinoma	Yes	No	Total mastectomy	3	0.7	Yes	yT1b	(0/1)	N0	+	+	+	0.3	Luminal B HER2+	Luminal B HER2+	No	< 10	X	X	X	X	X	X	X	X
20Ab	46	DCIS	Invasive ductal carcinoma	Yes	No	Total mastectomy	2	1.9	No	T1c	(0/2)	N0	+	+	-	X	ND	ND	Yes	< 10	16	High risk	Yes	No	No	No	49	NED
20Bb	X	DCIS	Invasive ductal carcinoma	Yes	N/a	Total mastectomy	2	0.6	No	T1b	(0/3)	N0	+	+	-	X	ND	ND	No	< 10	X	X	X	X	X	X	X	X
21	31	DCIS	Invasive ductal carcinoma	No	No	Total mastectomy	2	2.8	Yes	yT2	(0/5)	N0	+	+	+g	0.15	Luminal B HER2+	Luminal B HER2+	No	< 10	X	X	Yes	Yes	No	No	25	NED
22	30	DCIS	Invasive ductal carcinoma	No	No	Total mastectomy	3	0	Yes	yT0	(0/3)	N0	+	+	-	0.4	Luminal B HER2-	Luminal B HER2-	No	< 10	X	High risk	Yes	No	No	No	20	NED
23Ab	45	DCIS, P-LCIS	Invasive ductal carcinoma	No	Yes	Total mastectomy	3	0.7	Yes	yT1b	(1/8)	N1a	+	+	-	X	Luminal B HER2-	Luminal B HER2-	No	< 10	X	High risk	Yes	Yes	Yes	No	25	NED
23Bb	N/a	N/a	Invasive ductal carcinoma	No	Yes	N/a	2	0.3	No	N/a	X	X	-	-	+	0.5	HER2 enriched	HER2 enriched	No	< 10	X	X	X	X	X	X	X	X
24	36	DCIS	Invasive ductal carcinoma	No	Yes	Total mastectomy	2	0.35	No	T1a	(mi/1)	N1mi	+	+	-	0.3	Luminal B HER2-	Luminal B HER2-	No	20-40	15	X	Yes	No	No	No	20	NED
25	35	DCIS	Invasive ductal carcinoma	No	Yes	Partial mastectomy	3	0.9	No	T1b	(0/3)	N0	+	-	-	0.3	Luminal B HER2-	Luminal B HER2-	No	10-20	40	X	Yes	Yes	Yes	No	14	NED
26Ab	70	LCIS	Invasive lobular carcinoma, solid pattern	No	Yes	Partial mastectomy	2	2.4	No	T2	(1/2)	N1a	+	+	-	0.2	Luminal B HER2-	Luminal B HER2-	No	< 10	0	X	Yes	No	Yes	No	24	NED
26Bb	N/a	N/a	Invasive carcinoma with ductal/lobular features	No	Yes	N/a	2	1.5	No	N/a	X	X	+	+	-	0.1	Luminal A	Luminal A	No	< 10	X	X	X	X	X	X	X	X
27	30	DCIS	Invasive ductal carcinoma	No	No	Total mastectomy	1	1.7	No	T1c	(mi/3)	N1mi	+	+	-	0.02	Luminal A	Luminal A	Yes	< 10	12	X	Yes	No	No	No	15	NED
28Ac	61	DCIS	Invasive ductal carcinoma	Yes	No	Total mastectomy	2	1.1	Yes	yT1c	(0/6)	N0	+	+	-	X	ND	ND	No	< 10	X	X	Yes	No	No	No	183	NED
28Bc	N/a	N/a	Invasive ductal carcinoma	Yes	No	Total mastectomy	2	0.4	Yes	yT1a	(0/3)	N0	+	+	-	X	ND	ND	No	< 10	X	X	X	X	X	X	X	X
29	49	DCIS	Invasive ductal carcinoma	No	No	Partial mastectomy	3	3.2	Yes	yT2	(2/7)	N1a	+	+	-	X	ND	ND	Yes	< 10	X	X	Yes	Yes	Yes	Yes (liver)	160	AWD
30	43	DCIS	Invasive ductal carcinoma	No	No	Partial mastectomy	2	0.4	No	T1a	(0/4)	N0	+	+	+	X	Luminal B HER2+	Luminal B HER2+	No	< 10	18	X	Yes	No	Yes	No	136	NED
31Ac	45	DCIS	Invasive ductal carcinoma	Yes	No	Total mastectomy	3	1.8	No	T1c	(0/6)	N0	+	+	-	0.15	Luminal B HER2-	Luminal A	No	10-20	X	Low risk	Yes	No	No	No	15	NED
31Bb	N/a	DCIS, ADH	Invasive ductal carcinoma	No	Yes	Total mastectomy	1	1.5	No	T1c	(0/1)	N0	+	+	-	0.05	Luminal A	Luminal A	No	< 10	X	Low risk	X	X	No	X	X	X
31Cb	N/a	N/a	Invasive ductal carcinoma	No	Yes	N/a	2	0.9	No	N/a	X	X	+	+	-	0.1	Luminal A	Luminal A	No	< 10	X	X	X	X	X	X	X	X
32	39	DCIS	Invasive ductal carcinoma	No	No	Partial mastectomy	3	3	Yes	yT2	(mi/1)	N1mi	+	+	-	0.2	Luminal B HER2-	Luminal B HER2-	No	10-20	X	High risk	Yes	Yes	Yes	No	15	NED
33	57	X	Invasive ductal carcinoma	No	No	Total mastectomy	2	0	Yes	yT0	(0/4)	N0	+	+	+	0.7	Luminal B HER2+	Luminal B HER2+	No	< 10	X	High risk	Yes	No	No	No	15	NED
34	39	LCIS	Invasive lobular carcinoma	No	No	Total mastectomy	2	< 0.1	Yes	yTmi	(1/2)	N1a	+	+	-	0.5	Luminal B HER2-	Luminal B HER2-	No	N/a	X	High risk	Yes	No	Yes	No	14	NED
35	47	DCIS	Invasive ductal carcinoma	No	No	Partial mastectomy	2	0.7	Yes	yT1b	(2/5)	N1a	+	+	-	0.1	Luminal A	Luminal A	No	N/a	X	X	N/a	N/a	N/a	N/a	N/a	N/a
aFor tumors treated with neoadjuvant chemotherapy, indicated tumor size is based on pathologic evaluation after treatment
bSynchoronous ipsilateral
cSynchronous contralateral
dSurrogate molecular subtype using Ki-67 ≥14% for Luminal B
eSurrogate molecular subtype using Ki-67 ≥20% for Luminal B
fFluorescence in situ hybridization group 2, equivocal (2+) by immunohistochemistry
gHeterogeneous (HER2-positive and HER2-negative populations by immunohistochemistry and fluorescence in situ hybridization
Abbreviations: ADH, atypical ductal hyperplasia; ALH, atypical lobular hyperplasia; AWD, alive with disease; CT, chemotherapy; DCIS, ductal carcinoma in situ; DOD, died of disease; ER, estrogen receptor; FEA, flat epithelial atypia; F-LCIS, florid lobular carcinoma in situ; HER2, human epidermal growth factor receptor 2; HT, hormonal therapy; LCIS, lobular carcinoma in situ; LVI, lymphovascular i…
																	0	0
																	0	0
																	0.5
																	0.222222
																	0.692308
																	0.307692
																	0.222222
																	0.0555556

## Sheet: Table S3
Supplementary Table S3: Response of CHEK2 breast cancers to neoadjuvant chemotherapy
Patient/tumor	NACT	ER	HER2	Pre-treatment Nottingham grade	Pre-treatment MRI size (cm)	Pre-treatment Ki67 (%)	Tumor size (cm)a	LN Status	Post-treatment Ki67 (%)	Invasive cancer cellularity	RCB	RCB Class
3	TCHP	Negative	Positive	3	N/a	0.2	0	0/4	N/a	N/a	0	0
8	AC+T	Positive	Negative	3	6	0.6	1.1	(1mi/3)	N/a	0.3	2.41	II
14	TCHP	Positive	Positive	3	1.8	0.3	0	(2ITCs/7)	N/a	N/a	0.6	I
16Ab	AC+T	Positive	Negative	2	3.4	X	2.1	(0/2)	0.05	0.4	2.01	II
16Bb	AC+T	Positive	Negative	X	X	X	2.1	N/a	< 1%	0.1	1.46	II
16Cb	AC+T	X	X	X	X	X	0.5	N/a	N/a	0.03	0.73	I
17	TCHP	Positive	Negative	3	2.1	0.6	0.3	(0/3)	0	< 1%	0.66	I
19Ac	TCHP	Positive	Negative	2	1.5	0.2	1.5	(0/2)	0.05	0.5	1.89	II
19Bc	TCHP	Positive	Positive	3	1	0.3	0.7	(0/1)	0.05	0.5	1.6	II
21	TCHP	Positive	Positive	2	2.1	0.15	2.8	(0/5)	0.05	< 1%	0.73	I
22	D+CP	Positive	Negative	3	2.4	0.4	0	(0/3)	N/a	N/a	0	0
23	AC+THP	Positive	Negative	3	4	0.5	0.7*	(1/8)	< 1%	0.4	2.88	II
28Ac	AC+T	Positive	Negative	2	1.5	N/a	1.1	(0/6)	N/a	0.5	1.84	II
28Bc	AC+T	Positive	Negative	2	1.3	N/a	0.4	(0/3)	N/a	0.4	1.47	II
29	AC+T	Positive	Negative	3	3.8	N/a	3.3	(2/7)	N/a	0.02	2.77	II
32	AC+T	Positive	Negative	3	5.5	0.2	3	(mi/1)	< 1%	< 1%	2.52	II
33	TCHP	Positive	Positive	2	1.7	0.7	0	(0/4)	N/a	N/a	0	0
35	AC+T	Positive	Negative	2	2.6	0.1	0.7	(2/5)	0.01	< 5%	2.54	II
aPost-treatment size on pathologic evaluation
bSynchoronous ipsilateral
cSynchronous contralateral
Abbreviations: AC+T, Adriamycin-Carboplatin-Paclitaxel; AC-THP, Adriamycin-Carboplatin-Docetaxel-Trastuzumab-Pertuzumab; DC+T, Dostarliamb-Carboplatin-Paclitaxel; ER, estrogen receptor; HER2, human epidermal growth factor receptor 2; ITCs, Isolated tumor cells; LN, Lymph node; Mi, micrometastasis; N/a, Not applicable/study not performed; NACT, Neoadjuvant chemotherapy; RCB, Residual cancer burden…
